# Supplementary material
Source: publisher site journal article supplement (https://www.dovepress.com/article/291983)
Supplement: Supplementary file 1 [file get_supplementary_file.php]

**Supplementary material**

Supplementary Figure 1. Map of the Spanish regions pooled according to population and health expenditure criteria


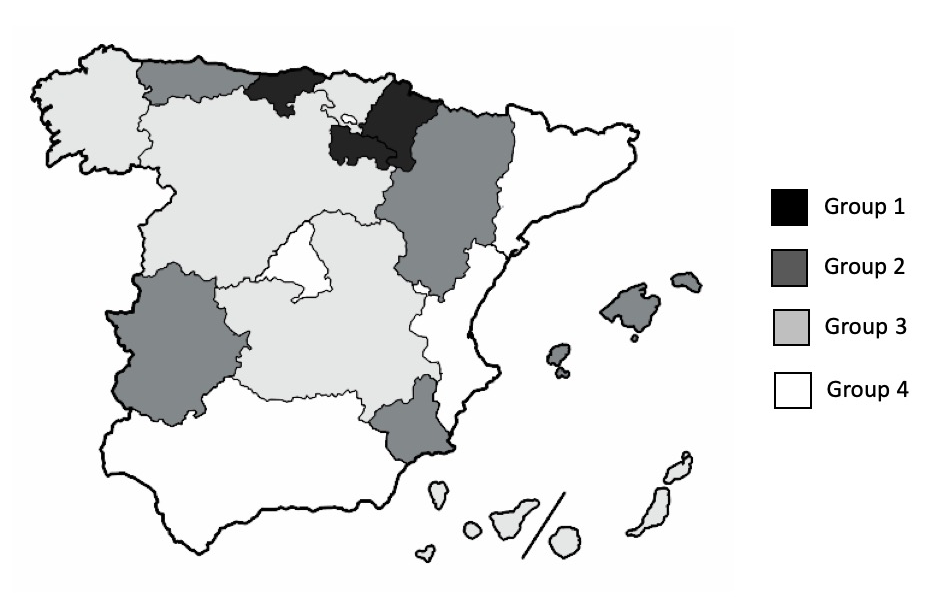


Supplementary Table 1. Association of study variables with treatment adherence: analysis including 859 patients

| **Variable** | **Univariate analysis** | **Coef. (95% CI)** | **Multivariate analysis** | **Coef. (95% CI)** | **Multivariate analysis adjusted for age and sex** | **Coef. (95% CI)** |
| --- | --- | --- | --- | --- | --- | --- |
| Duration of RA | 0.672 | 0.007 (-0.03, 0.04) | 0.587 | 0.01 (-0.03, 0.05) | - | - |
| Number of drugs | 0.005 | 0.41 (0.12, 0.70) | 0.000 | 0.73 (0.35, 1.11) | 0.001 | 0.50 (0.20, 0.79) |
| Glucocorticoids use | 0.567 | 0.18 (-0.45, 0.82) | 0.264 | -0.43 (-1.20, 0.33) | - | - |
| cDMARD use | 0.439 | -0.31 (-1.09, 0.47) | 0.032 | -1.08 (-2.06, -0.92) | 0.133 | -0.61 (-1.40, 0.19) |
| SC cDMARD vs oral | 0.340 | -0.38 (-1.15, 0.40) | 0.468 | -0.30 (-1.10, 0.51) | - | - |
| bDMARD use | 0.918 | 0.03 (-0.60, 0.66) | 0.121 | -0.68 (-1.54, 0.18) | - | - |
| IV bDMARD vs SC | 0.408 | -0.36 (-1.22, 0.49) | 0.316 | -0.52 (-1.52, 0.49) | - | - |
| Civil status | 0.001 | -0.51 (-0.81, -0.20) | 0.308 | -0.24 (-0.69, 0.22) | 0.303 | -0.23 (-0.68, 0.21) |
| Cohabitation | 0.004 | -0.61 (-1.02, -2.0) | 0.311 | -0.35 (-1.04, 0.33) | 0.114 | -0.47 (-1.04, 0.11) |
| Education level | 0.151 | -0.16 (-0.38, 0.06) | 0.933 | -0.01 (-0.69, 0.22) | - | - |
| Sex | 0.442 | 0.30 (-0.46, 1.06) | 0.456 | 0.29 (-0.48, 1.06) | 0.471 | 0.29 (-0.48, 1.06) |
| Age | 0.044 | -0.03 (-0.05, -0.007) | 0.102 | -0.02 (-0.05, 0.005) | 0.146 | -0.02 (-0.05, 0.007) |
| Specific day hospital vs polyvalent | 0.882 | -0.03 (-0.44, 0.38) | 0.765 | -0.07 (-0.50, 0.36) | - | - |
